# Supplementary material for: Latent TGFβ complexes are transglutaminase cross-linked to fibrillin to facilitate TGFβ activation
Source: PubMed Central journal article supplement (PMC8932414; doi:10.1016/j.matbio.2022.01.005), 2022-03
Supplement: mmc1.pdf [file mmc1.pdf]

# Supplementary Figure 1

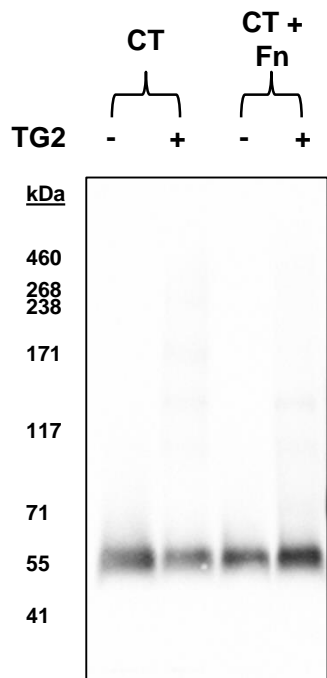

Western Blot analysis of LTBP1-CT and Fn incubated with or without TG2 for 3 hours. No higher molecular weight species are observed. This analysis was performed at least three times ( $n>3$ ).

## Supplementary Figure 2

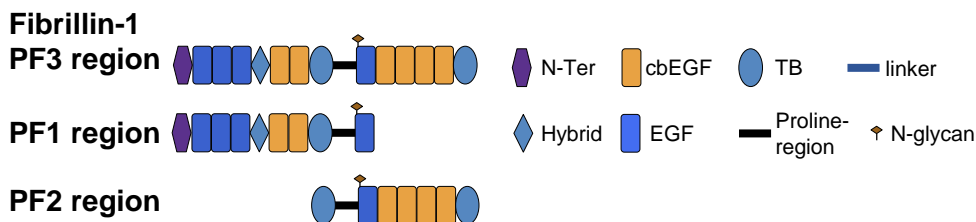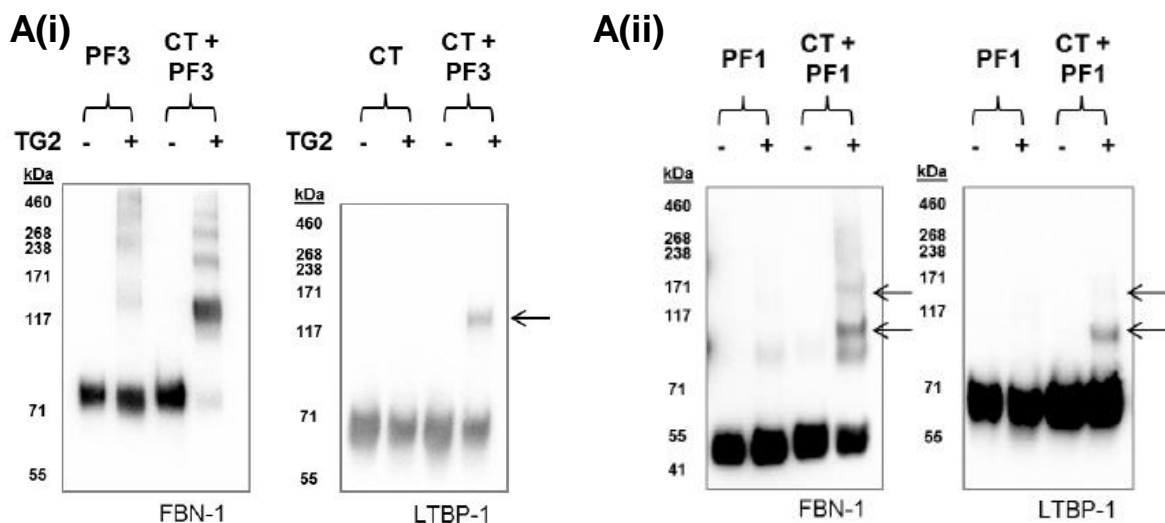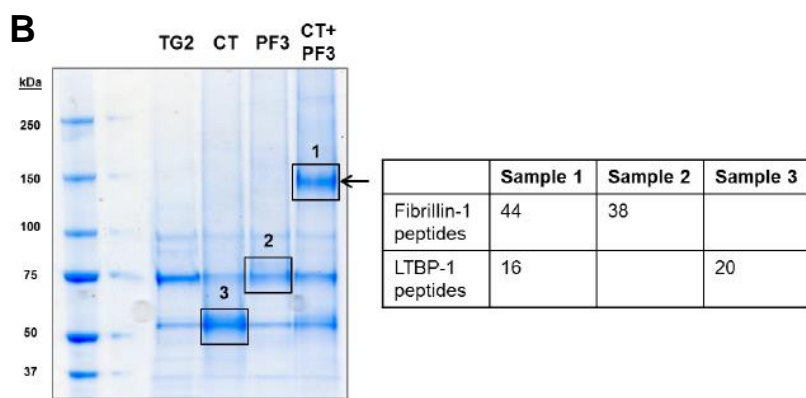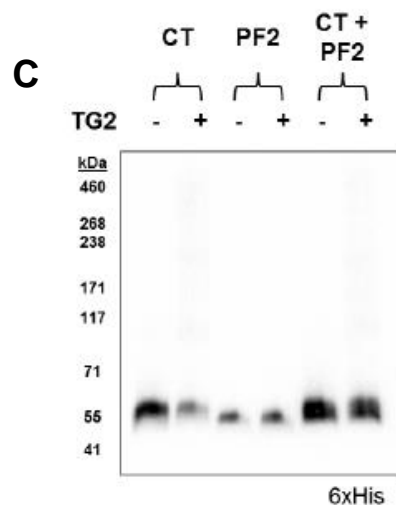

- (A) Western Blot analysis of LTBP1-CT and fibrillin PF3 (i) or PF1 (ii) incubated with TG2 for 3 hours using fibrillin-1 and LTBP1 specific primary antibodies. In (i) the arrow shown on the LTBP-1 blot shows the presence of the LTBP1-CT:PF3 complex without formation of higher oligomers. The anti-fibrillin blot shows the formation of some higher order PF3 oligomers but an enrichment of the LTBP1-CT:PF3 complex. This analysis was performed at least three times ( $n>3$ ). In (ii) the arrows depict higher molecular weight bands only detected when LTBP1-CT and PF1 were incubated with TG2. This analysis was performed twice ( $n=2$ ).
- (B) SDS-PAGE gel run under reducing conditions stained with Coomassie brilliant blue stain. The arrow depicts the 150 kDa band corresponding to the LTBP1-CT:PF3 complex. Black boxes show the bands excised for in gel digestion and mass spectrometry. LTBP1 and fibrillin peptides were both detected in the excised band from sample 1 as indicated in the table which shows the number of unique peptides identified. This analysis was performed once ( $n=1$ ).
- (C) Western blotting showing fibrillin-1 and LTBP-1 bands after incubation of LTBP1-CT and fibrillin PF2 with or without TG2. This analysis was performed three times ( $n=3$ ).

# Supplementary Figure 3

## A

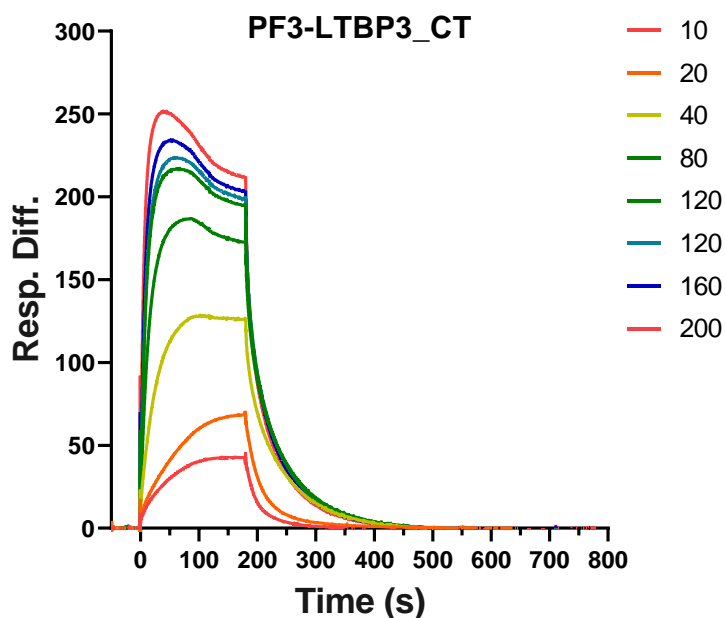

## B

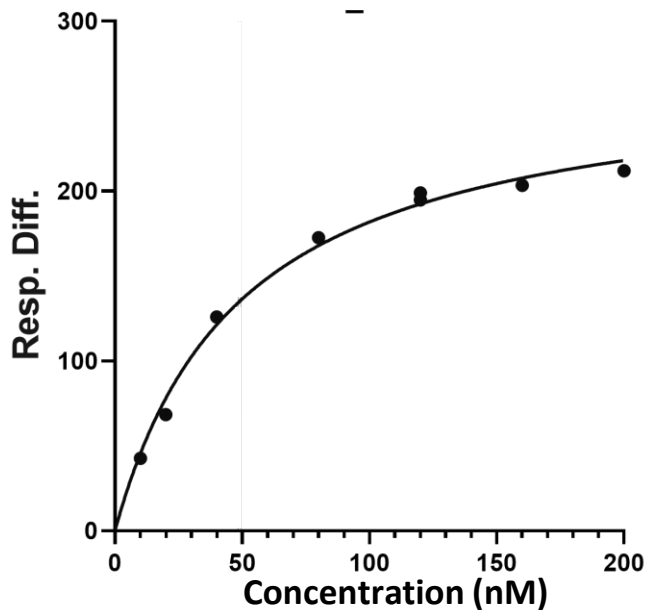

- (A) Surface plasmon resonance curves showing the binding response detected between immobilised LTBP3-CT and a range of concentrations (200-10 nM) of fibrillin PF3 used as the analyte.
- (B) The binding affinity  $K_D$  was determined by equilibrium analysis where a  $K_D$  of  $49.7 \pm 5.5$  nM was extrapolated. Experiments were performed in triplicate and representative results are shown.

# Supplementary Figure 4

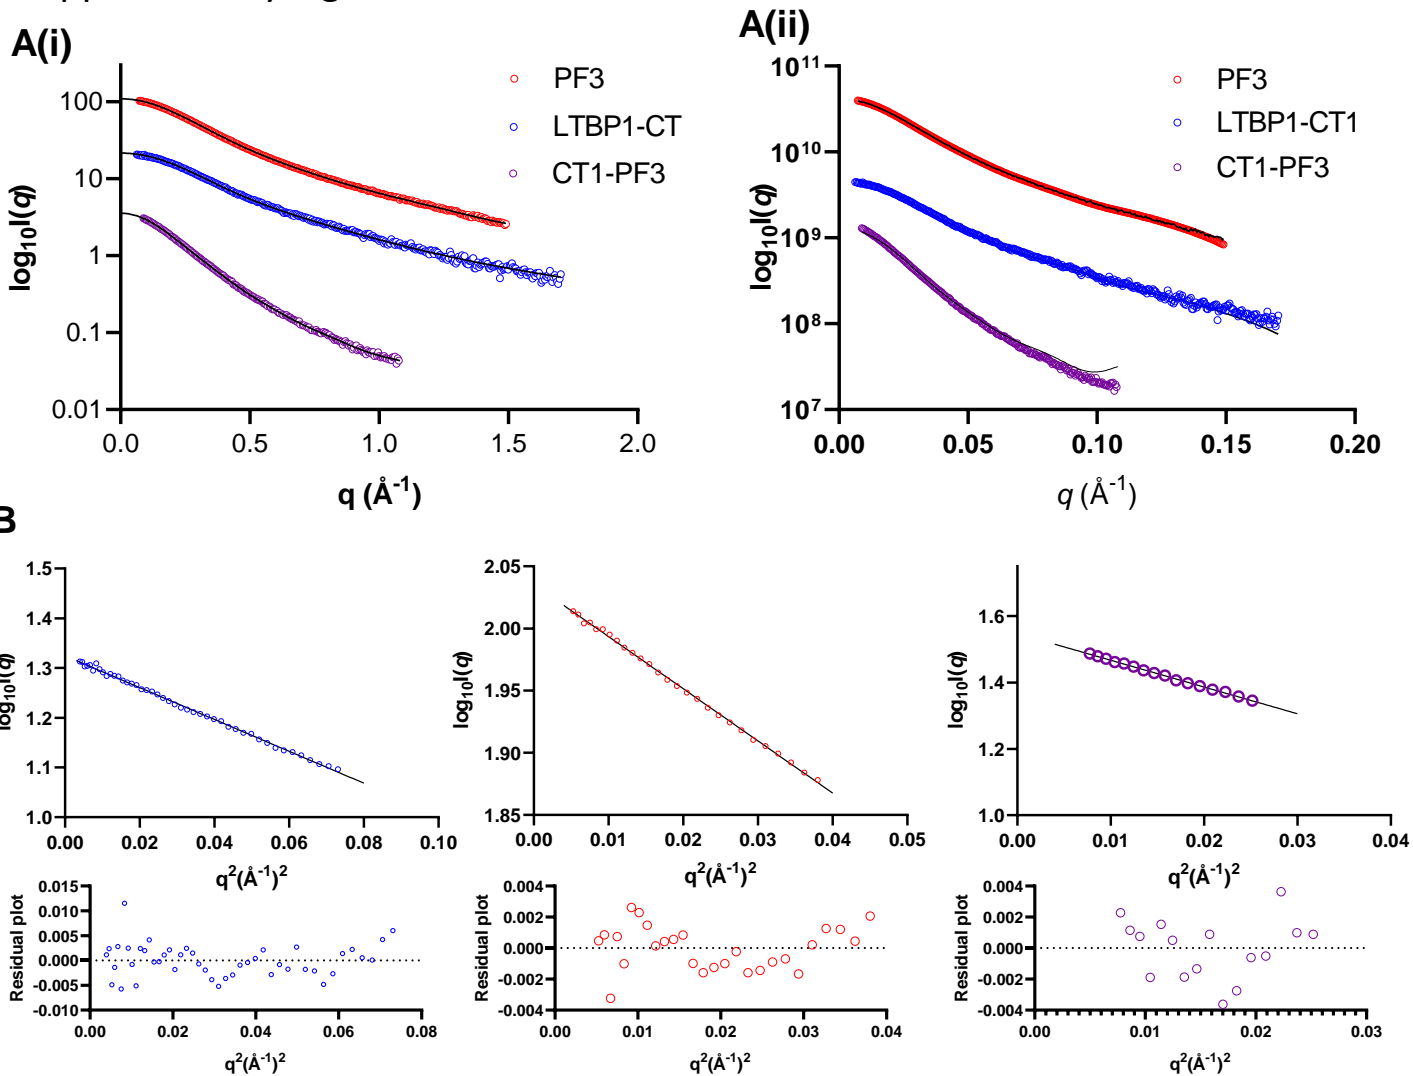

- (A) The experimental X-ray scattering intensity ( $I$ ) plotted as a function of  $q$  for fibrillin PF3 (red), LTBP1-CT (blue) and the CT1-PF3 cross-linked complex (purple). In (i) the black lines show the fit of the probability distribution ( $P_r$ ), shown in figure 5B, to the experimental data and in (ii) the black lines show a representative fit from the multiphase modelling performed using MONSA shown in figure 5C.
- (B) Guinier plot with residuals of the low  $q$  region for fibrillin PF3 (red), LTBP1-CT (blue) and the CT1-PF3 cross-linked complex (purple) showing linearity and therefore homogeneous samples.

# SAXS Data

## Supplementary Table 1

|                                                       | Fibrillin1 PF3                          | LTBP1 CT                           | Complex                 |
|-------------------------------------------------------|-----------------------------------------|------------------------------------|-------------------------|
| <b>Protein Properties</b>                             |                                         |                                    |                         |
| Organism                                              | Homo sapiens                            |                                    |                         |
| Uniprot sequence ID (residues)                        | P35555 (45-722 + LVPRGS HHHHHH)         | Q14766 (1002-1395 + LVPRGS HHHHHH) | N/A                     |
| Mass (Da)                                             | 74307.63 (+ 1 glycan)                   | 45592.71 (+ 1 glycan)              | 119900.34 (+ 2 glycans) |
| Extinction coefficient [A <sub>280</sub> , 0.1%(w/v)] | 0.757                                   | 1.103                              | 0.895                   |
| <b>Data Collection Parameters</b>                     |                                         |                                    |                         |
| Source                                                | European Synchrotron Radiation Facility |                                    |                         |
| Beamline                                              | BM29                                    |                                    |                         |
| Wavelength (Å)                                        | 0.992                                   |                                    |                         |
| Camera Length (mm)                                    | 2.9 m                                   |                                    |                         |
| q measurement range (Å <sup>-1</sup> )                | 0.003 < q < 0.49                        |                                    |                         |
| Detector                                              | Pilatus 1M                              |                                    |                         |
| Monitoring Radiation Damage                           | Frame by frame comparison               |                                    |                         |
| Method of collection                                  | SEC-SAXS (S200 increase 3.2/300)        |                                    |                         |
| Exposure [frame × time(s)]                            | 2000 × 1                                |                                    |                         |
| Buffer used                                           | TBS                                     |                                    |                         |

# SAXS Data

## Supplementary Table 2

| <b>Software employed for SAXS data reduction, analysis and interpretation.</b> | <b>Fibrillin1 PF3</b>    | <b>LTBP1 CT</b> | <b>Complex</b> |
|--------------------------------------------------------------------------------|--------------------------|-----------------|----------------|
| SAXS data reduction                                                            | In-house custom software |                 |                |
| Protein Parameter estimates                                                    | ProtParam                |                 |                |
| Basic Analysis                                                                 | Primus                   |                 |                |
| Bead modelling                                                                 | MONSA                    |                 |                |
| Graphical representation                                                       | UCSF Chimera – 1.13      |                 |                |

# SAXS Data

## Supplementary Table 3

|                                       | Fibrillin1 PF3 | LTBP1 CT      | Complex       |
|---------------------------------------|----------------|---------------|---------------|
| <b>Guinier Analysis</b>               |                |               |               |
| I(0) (cm <sup>-1</sup> )              | 109.4          | 21.53         | 35.64         |
| R <sub>g</sub> (Å)                    | 56.41          | 50.46         | 77.88         |
| <b>P(r) analysis</b>                  |                |               |               |
| I(0) (cm <sup>-1</sup> )              | 109.4          | 21.53         | 35.64         |
| R <sub>g</sub> (Å)                    | 56.70          | 50.58         | 78.40         |
| D <sub>max</sub> (Å)                  | 240            | 205           | 294           |
| q <sub>range</sub> (Å <sup>-1</sup> ) | 0.072 – 0.149  | 0.063 – 0.170 | 0.088 – 0.108 |
| χ <sup>2</sup> (from datgnom)         | 0.63           | 0.93          | 0.63          |
| <b>Mass estimation (kDa)</b>          |                |               |               |
| Baysian                               | 85650          | 58150         | 318450        |
| V <sub>c</sub>                        | 70428          | 52031         | 294553        |

# Supplementary Figure 5

**A**

```

LTBP1   DLCWEHLSDEYVCSRPLVGRKQTTYTECCCLYGEAWGMQ*CALCPLKDSDDYAQLC
LTBP2   DICWKKVTND-VCSEPLRGHRTTYTECCCQDGEAWSQQCALCPPRSSEVYAQLC
LTBP3   DVCWSQRGEDGMCAGPLAGPALTFDDCCCRQGRGWGAQCRPCPPRGA---GSHC
LTBP4   GVCWQEVGADLVCSHPRLDRQATYTECCCLYGEAWGMDCALCPAQDSDDFEALC
    
```

**B**

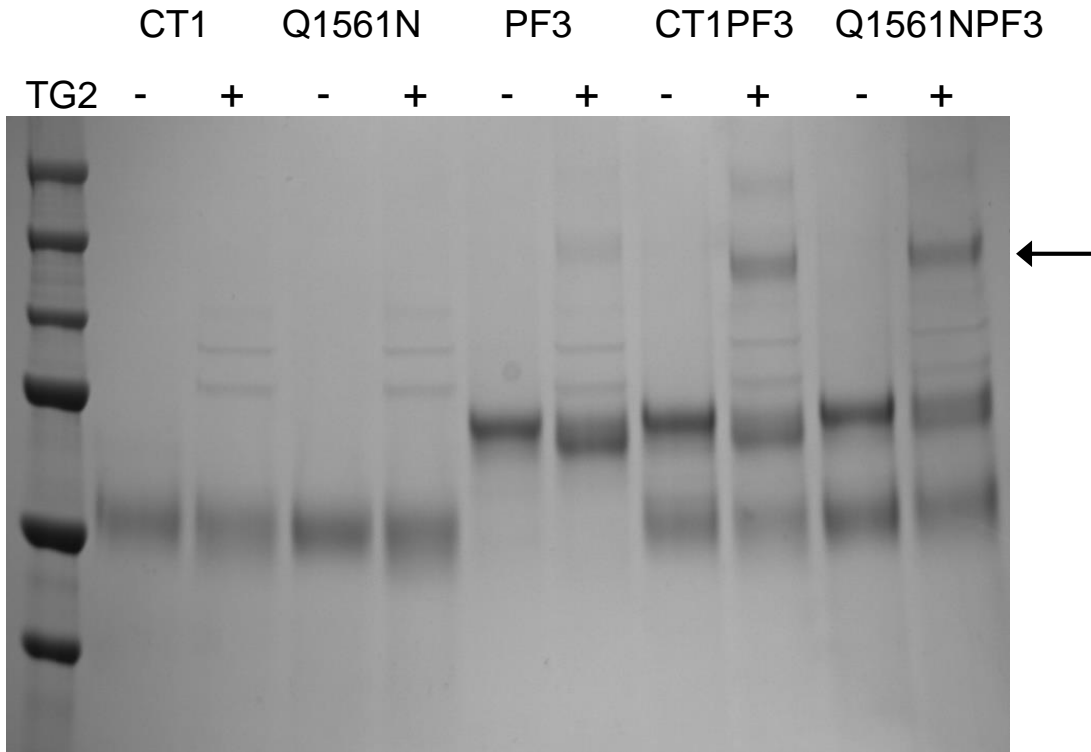

- (A) Sequence alignment for the TB3 domain from human LTBP1-4 with Glutamine and Lysine residues highlighted in yellow and cyan, respectively. Residue Q1561 is conserved in LTBP1, 2 and 3 but not LTBP4 and is highlighted by an asterisk.
- (B) SDS-PAGE gel stained with Coomassie Blue, showing the fibrillin PF3 fragment and the C-terminal region of LTBP1 (CT1) and a Q1561N mutation in the presence (+) and absence (-) of transglutaminase-2 (TG2). When incubated, complexes form between PF3-CT1 and PF3-CT1-Q1561N shown by an arrow.
